# Supplementary material for: Sparse activity of identified dentate granule cells during spatial exploration
Source: eLife. 2016 Oct 3;5:e20252. doi: 10.7554/eLife.20252 (PMC5077296; doi:10.7554/eLife.20252)
Supplement: Figure 4—source data 1. — The table summarizes the main electrophysiological and morphological properties of the identified and reconstructed silent and active GCs (source data for Figure 4). Morphologies of the neurons are shown in Figure 4—figure supplement 1. DOI: http://dx.doi.org/10.7554/eLife.20252.009 [file elife-20252-fig4-data1.xlsx]

## Sheet: Sheet1
Cell id	Animal id	Avg. Rate (Hz)	# of Spikes	Rec Duration (s)	Total Distance (m)	Field Size (pixels)	Spatial Information (bits/spike)	Max Firing Rate (Hz)	In-Field Rate (Hz)	Out-of-Field Rate (Hz)	Total Dendritic Length (mm)	Dendritic Length Order 1 (mm)	Dendritic Length Order 2 (mm)	Dendritic Length Order 3 (mm)	Dendritic Length Order 4 (mm)	Dendritic Length Order 5 (mm)	Dendritic Length Order 6 (mm)	Dendritic Length Order 7 (mm)	# Primary Dendrites	# Dendritic Endings	# Spines	Branching Index	Complexity Index	Soma Location	DG Blade (s/i)
83	21	1.33	392	294.9	30.7	-	0.41	11	-	-	2233.7	11	24.9	280	423.3	855.5	531.7	107.4	1	19	1701.1	19	235842	1	s
98	9	0.17	11	65.5	6.2	-	0.32	6.5	-	-	2040.9	49.5	44.5	350.1	543.3	719.6	333.8	0	1	12	1486.7	12	120152	0	s
102	15	2.33	820	351.7	24.8	118	2.11	24.3	11.5	0.94	2429.8	16.8	84.7	209.4	1062.7	767.9	288	0	1	19	1828.4	19	235374	0.6	s
103	18	1.32	591	448.1	40.3	71	0.67	14.3	6.76	0.33	1970.9	11.1	16.9	161.4	858.8	847	75.7	0	1	13	1522.4	13	123674	0.5	i
104	23	1.38	176	128	12.8	80	4.92	25	11.87	0.52	3265.9	11.7	26.7	566.1	1621.2	578.1	462	0	1	17	2462.1	17	267184	0.6	s
1046	38	1.93	463	239.3	26.9	60	1.78	19.3	9.9	1.3	2376.8	19.9	43.8	189.1	847.9	886.9	389.9	0	1	14	1816.6	14	165558	0.5	s
924	58	0	0	151.8	13.3						2060.8	12.8	18.5	268.3	635.9	928.9	99	97.5	1	18	1568.1	18	199311	0.2	i
925	58	0	0	138.6	13.2						2347	267.3	628.2	951.5	341.3	158.5	0	0	4	17	1026.3	4.25	32793.3	1.1	s
940	26	0	0	122.7	13.6						3121.1	38.7	1042.9	666.2	1164.8	178.4	0	0	3	15	1587.5	5	55482.6	1	s
942	22	0	0	130.9	6.8						2019.4	23.2	228.5	723.1	1044.5	0	0	0	2	12	1282.2	6	44195.4	0.9	s
949	30	0	0	160	13.5						2423.3	16.7	161.9	735.2	902.1	607	0	0	2	14	1653.2	7	67567.8	0.2	s
991	27	0	0	229.1	25						2288.1	56.7	387.4	947.1	529.4	292.1	19.3	55.9	3	18	1312.5	6	55310	0.4	i
993	56	0	0	118.2	11.8						1471	12.3	74.4	313.9	625.7	444.8	0	0	1	9	1047.9	9	57138.9	0.8	s
